# Supplementary material
Source: PubMed Central journal article supplement (PMC6777833)
Supplement: jciinsight-4-125437-s224.pdf [file jciinsight-4-125437-s224.pdf]

# Supplemental Information

## Supplemental methods

*Mice.* Mice were bred and maintained under pathogen-free conditions at Chonnam National University Medical School animal facilities. Male inbred BALB/C nude mice were purchased from Orient Bio Inc. (Gyeonggi-Do, Korea). *Angptl4* knockout mice on a C57BL/6J genetic background were provided by Dr. Min-Seon Kim (University of Ulsan College of Medicine, Korea) (1). All experiments were performed after approval by our local ethical committee at Chonnam National University Medical School (CNU IACUC-H-2016-37).

*Cell culture.* Human bone marrow-derived mesenchymal stem cells (hMSCs), immortalized by the introduction of telomerase, were kindly provided by Professor Yeon-Soo Kim (Inje University, Seoul, South Korea). hMSCs were maintained in Dulbecco's Modified Eagle Medium (DMEM, Gibco, 11965-092) with 10% fetal bovine serum. Human adipose tissue-derived mesenchymal stem cells (hATSCs) were obtained in accordance with guidelines approved by Chonnam National University Hospital Institutional Review Board (IRB No. CNUH-2016-266). Freshly excised human fat tissue was obtained from the waste after liposuction. Fat tissues were digested in 0.1% collagenase I (Sigma, C0130) solution for 30 minutes at 37°C with gentle shaking. After incubation, the digestion mixture was homogenized through a 40- $\mu$ m nylon mesh and was centrifuged at 1500 rpm for 10 minutes at 4°C. Harvested cells were cultured in DMEM (Gibco, 11885084) with 10% fetal bovine serum and penicillin/streptomycin. Mouse mesenchymal stem cells (mMSCs) were isolated from bone marrow and cultured (2). Bone marrow cells were collected by flushing the femurs and tibias and were cultured with MesenPRO RS basal with MesenPRO RS growth supplement (Gibco, 12746012), L-glutamine (Gibco, 25030081), 100 mg/mL penicillin and 100 mg/mL streptomycin (Gibco, 15140-122). The culture medium was changed on day 3 to remove non-adherent cells. The medium was subsequently replaced for 4 days, and the mMSCs were used within four passages.

Human macrophages were differentiated from CD14<sup>+</sup> monocytes isolated from peripheral blood. Blood sampling was performed under protocols approved by the institutional review board of Chonnam National University Hospital (IRB No. CNUHH-2018-018). Peripheral blood mononuclear cells (PBMCs) were isolated from peripheral blood by density centrifugation by Lymphoprep (stemcell, 07801) according to the manufacturer instructions. CD14<sup>+</sup> monocytes were separated from PBMCs by using anti-CD14 mAb-coupled magnetic beads (CD14 MicroBeads; Miltenyi Biotech, 130-050-201) followed by MACS column separation according to the manufacturer's protocol (3). The purity of monocytes was evaluated by fluorescent staining with CD14-APC monoclonal antibody (HCD14, 325608) from Biolegend and FACS analysis (4). Monocytes were seeded into tissue culture plates at a density of  $1 \times 10^6$  cells per ml and treated for 6 days with 30 ng/mL GM-CSF (PeproTech, 300-03) in RPMI 1640 and differentiated into macrophages for 3 days with LPS (50 ng/mL), IFN- $\gamma$  (20 ng/mL, ThermoFisher Scientific, PHC4031) and IL-6 (20 ng/mL, Peprotech, 200-06). Human monocytic THP-1 cells, purchased from the Korean Cell Line Bank, were cultured in RPMI 1640 (Gibco, 11875-093) supplemented with 10% fetal bovine serum (Gibco, 16000044), 100 mg/mL penicillin, and 100 mg/mL streptomycin (Gibco, 15140-122). To differentiate THP-1 cells into macrophages, cells were treated with PMA (Sigma-Aldrich, 8139, 200 nmol/L) for 72 hours. For mouse bone marrow-derived macrophages (BMDMs), mononuclear cells were isolated from mouse bone marrow and cultured for 7 days in macrophage differentiation medium (supplemented with 30% L929 cell-conditioned medium, 20% fetal bovine serum, and 50% RPMI-1640). L929 cell-conditioned medium was prepared by growing L929 cells in RPMI-1640 containing 10% fetal bovine serum for 10 days. The medium containing macrophage colony-stimulating factor secreted by the L929 cells was harvested and passed through a 0.22-mm filter. BMDMs were stimulated with LPS 100 ng/mL and IFN- $\gamma$  30 ng/mL for 24 hours or 48 hours.

To coculture MSCs and macrophages, MSCs or macrophages were seeded to adhere at  $2 \times 10^5$  cells/well in 6-well plates. The next day, 0.4- $\mu$ m-pore size Transwell (Corning Transwell, 3401) inserts were added into the 6-well plates with the hMSCs initially seeded at the bottom well. MSCs or

macrophages were then seeded onto the inserts. After 24 hours or 48 hours, the inserts were discarded, and the cells in the 6-well plate were washed and used for further analysis.

HEK293T cells were cultured in DMEM (Gibco, 11965-092) supplemented with 10% fetal bovine serum and penicillin/streptomycin.

*Isolation of neonatal rat cardiomyocytes and cardiac fibroblasts.* Primary cardiomyocytes and cardiac fibroblasts were isolated from 2 day-old Sprague-Dawley rats (5). Briefly, neonatal ventricles from neonatal rats euthanized by decapitation were separated and washed in cold-PBS, chopped using a scalpel, and digested with 0.1% collagenase type 2 (210 U/mL, Worthington Laboratories, LS004176) and pancreatin (0.6 mg/mL, Sigma-Aldrich, P3292) for 30 minutes with mild stirring. The supernatant was collected for centrifugation a Percoll gradient (GE-Healthcare, 17-0891-02) at 1000 rpm for 5 minutes. The cardiac cell layer was collected and cultured in a flask with DMEM supplemented with 10% heat-inactivated fetal bovine serum. After 1 hour, the non-adherent cardiomyocyte population was removed from the adherent cardiac fibroblasts. The proliferation culture for cardiac fibroblasts was supplemented with DMEM with 10% fetal bovine serum and 1% PenStrep (50 units/mL penicillin and 50 µg/mL streptomycin). The fibroblasts were used for experiments at passage 2 or passage 3.

*Reagents and plasmids.* The following reagents were used in this study: LPS (Sigma-Aldrich, L4391), PMA (Sigma-Aldrich, 8139), recombinant human interferon- $\gamma$  (IFN- $\gamma$ ; ThermoFisher Scientific, PHC4031), recombinant human ANGPTL4 (R&D Systems, 4487-AN), recombinant mouse ANGPTL4 (R&D Systems, 4880-AN), granulocyte macrophage colony-stimulating factor (GM-CSF, Peprotech, 300-03), recombinant human interleukin-6 (IL-6, Peprotech, 200-06), GW4869 (Sigma-Aldrich, 6823-69-4), cytochalasin D (Sigma-Aldrich, 22144-77-0), SR1078 (Tocris Bioscience, 4874), SR1001 (Tocris Bioscience, 4868), SR3335 (Cayman, 293753-05-6), recombinant human TNF- $\alpha$  (R&D Systems, 210-TA), recombinant human interleukin-1 $\beta$ /IL-1F2 (R&D Systems, 201-LB), and angiotensin II (Sigma-Aldrich, A9525).

Antibodies used in this study are listed in Supplementary Table 2. ROR $\alpha$  construct was purchased from OriGene (RC 202926). ANGPTL4 promoter was purchased from SwitchGear Genomics (S714374). Plasmids used for functional analysis of the ANGPTL4 promoter activity were generated by using pGL3-Basic vector (Promega, E1751) containing a luciferase reporter gene. Serially deleted mutants of the human ANGPTL4 promoter were PCR amplified with the use of restriction enzyme recognition sites (*Nhe I/Hind III*) from the ANGPTL4 promoter sequence and inserted into the *Nhe I/Hind III* sites of the pGL3-Basic vector.

*Microarray analysis.* We analyzed the gene expression of hMSCs by microarray analysis. The quality and quantity of extracted RNA was assessed by using an Agilent 2100 Bioanalyzer, and RNA was amplified by use of Agilent's Low RNA Input Linear Amplification kit PLUS and hybridized to Agilent Rat expression 4X44K (v3).

*Quantitative RT-PCR.* In all cases, total RNA was extracted with Trizol Reagent (Life Technologies, 15596018) and converted to cDNA by using an Applied Biosystems High-Capacity cDNA Reverse transcription kit (Life Technologies, 4368814), according to the manufacturer's instructions. Real-time PCR was performed using a QuantiTect SYBR Green PCR kit (Qiagen, 204143) and Corbett Research Rotor-Gene RG-3000 Real Time PCR System. Pre-designed primers for human ANGPTL4, CXCL9, CXCL10, CXCL11, CCR7, CD80, TNF, Granulocyte macrophage colony-stimulating factor (CSF2), IL-1 $\beta$ , IL6, IL8, MIP-1 $\alpha$  (chemokine(C-C motif) ligand 3; CCL3), MIP-1 $\beta$  (chemokine(C-C motif) ligand 4; CCL4), and ROR $\alpha$  were purchased from Bioneer. Mouse primers are listed in Supplemental Table 2.

*Chromatin immunoprecipitation.* Chromatin immunoprecipitation (ChIP) was performed using the ChIP Assay Kit (Abcam, ab500) according to the manufacturer's instructions. Briefly,  $1 \times 10^7$  MSCs were fixed with 10% formaldehyde to cross-link histones to DNA. Cells were lysed with lysis buffer (0.3% NP40, 0.1 mmol/L EDTA, 10 mmol/L HEPES pH 7.9, 10 mmol/L KCl) to enrich nuclei.

Chromatin with chromatin shearing buffer was sheared by sonication to an optimal DNA fragment size of 200-1000 bp. The soluble chromatin supernatant was immunoprecipitated with anti-ROR $\alpha$  (Abcam, ab60134), negative control (IgG), and positive control (Histone H3). Immunoprecipitated DNA and input DNA were analyzed by real-time PCR, and the results were presented as percentage of input.

*Luciferase reporter assay.* For luciferase assay, transfections were performed with Lipofectamine 2000 transfection reagent (Invitrogen, 11668-019) in HEK293T cells. The *Renilla* luciferase vector was co-transfected with ANGPTL4 deletion constructs and ROR $\alpha$  for control of transfection efficiency. Promoter activities were measured by using the Dual Glo Luciferase Assay kit (Promega, E1960) and a Sirius Luminometer (Berthold Technologies) according to the manufacturer's instructions.

*Transfection of plasmid DNA and siRNA.* Human ROR $\alpha$  plasmid DNA (OriGene, RC202926) was transfected to MSCs by using X-tremeGENE HP DNA Transfection Reagent (Roche, 6366236001). RNA interference was performed according to the manufacturer's protocols. Briefly, siRNA-control (siCon), ANGPTL4 siRNA (siANGPTL4), and ROR $\alpha$  siRNA (siROR $\alpha$ ) were purchased from Bioneer. Cells were transfected with siRNA using Lipofectamine RNAiMAX transfection reagent (Invitrogen, 13778150) according to the manufacturer's protocols.

*Immunoblot analysis.* Cells were washed with ice-cold phosphate-buffered saline and lysed in lysis buffer (20 mmol/L Tris-HCl pH 7.4, 0.1 mmol/L EDTA, 150 mmol/L NaCl, 1 mmol/L phenylmethylsulfonyl fluoride, 1 mg/mL leupeptin) on a rotation wheel for 1 hour at 4°C. After centrifugation at 10,000  $\times g$  for 10 minutes, the supernatant was prepared as a protein extract. Equal concentrations of proteins were fractionated by electrophoresis on 8% or 10% acrylamide gels and were transferred onto a polyvinylidene fluoride membrane (Millipore, IPVH00010) membrane, followed by blotting with primary antibody and conjugated antibody with horseradish peroxidase-

conjugated IgG. Protein expression was detected by using Image Reader (LAS-3000 Imaging System, Fuji Photo Film).

*Immunocytochemistry.* The cells were fixed in 4% paraformaldehyde for 15 minutes. Then the cell membrane was penetrated by 0.25% Triton X-100 for 10 minutes and blocked by normal goat serum for 1 hour, followed by primary antibody staining at 4°C overnight. Subsequently the cells were incubated with secondary antibodies conjugated with Alexa-488 (Molecular Probes, A11034) or Alexa-594 (Molecular Probes, A11037) for 1 hour, followed by mounting with 4,6-diamidino-2-phenylindole (Molecular Probes, D1306).

*Enzyme-linked immunosorbent assay.* The protein levels of IP-10 (CXCL10, eBioscience, BMS284INST), IL-6 (Invitrogen, BMS603-2), IL-1 $\beta$  (Invitrogen, BMS6002), and ANGPTL4 (RayBiotech, ELH-ANGPTL4 for human ANGPTL4, and Elabscience, E-EL-M0093 for mouse ANGPTL4) were evaluated by using enzyme-linked immunosorbent assay (ELISA) kits. Inflammatory mediators in mouse plasma were evaluated by Multi-Analyte ELISArray kit (Qiagen, 336161).

*Cytokine antibody array.* Cytokine expression profiles in the supernatants and cell lysates of MSCs were detected by using the human cytokine array panel A (proteome profiler, R&D Systems, ARY005B) according to the manufacturer's instructions. Briefly, cytokine array membranes were blocked in 2 mL of blocking buffer for 1 hour and then incubated with 2 mL of the samples and antibody mixtures overnight at 4°C. The sample mixtures were then decanted from each container, and the membranes were washed 3 times with 2 mL of wash buffer at room temperature with shaking. The membranes were then incubated in 1:2000-diluted streptavidin-horseradish peroxidase at room temperature for 30 minutes and the membranes were washed thoroughly and exposed to a peroxidase substrate before imaging.

*Mouse peritonitis model.* This study was reviewed and approved by the Chonnam National University Institutional Animal Care and Use Committee (CNU IACUC-H-2016-37), and all experiments were performed after approval by a local ethical committee at Chonnam National University Medical School. Peritonitis was induced in mice (7-8 weeks of age) with a peritoneal injection of 4% thioglycollate (BD, 211716). Three days later, 1.5 mL of vehicle (growth medium), coculture medium (CCM) or ANGPTL4 protein was injected into the peritoneum, and 15 hours later, mice were injected intraperitoneally with LPS (100 µg) for 4 hours. The peritoneal macrophages were collected from the peritoneal cavity by washing with PBS and adherent macrophages were assessed by further analyses.

*Mouse myocardial infarction model.* Male inbred Balb/C nude mice (7-8 weeks of age) were purchased from ORIENT BIO Inc. This study was reviewed and approved by the Chonnam National University Institutional Animal Care and Use Committee (CNU IACUC-H-2016-37), and all experiments were performed after approval by a local ethical committee at Chonnam National University Medical School. Mice were anesthetized with an intramuscular injection of ketamine (50 mg/kg) and xylazine (5 mg/kg), intubated, and mechanically ventilated. The proximal left anterior descending coronary artery was ligated and the mice were randomly divided into three groups. Upon ligation, 1.5 mL of vehicle (growth medium), CCM, or ANGPTL4 protein was injected into the peritoneum at day 0 and 1 after myocardial infarction (MI). Mouse blood samples were collected and transferred into EDTA tubes, and plasma was obtained by centrifugation at  $1,500 \times g$  at 4°C for 15 minutes.

*Echocardiography.* Cardiac function was assessed by echocardiography. At 2 weeks after injection of MSCs, the mice were anesthetized, intubated, and mechanically ventilated. Their cardiac function, including ejection fraction and fractional shortening, was measured by transthoracic echocardiography (15-MHz linear array transducer system; iE33 system, Philips Medical Systems; Amsterdam, Netherland). Fractional shortening was calculated as  $100 \times (LVDd - LVDs) / LVDd$  (%).

*Histological analyses and immunohistochemistry.* For histological studies, the heart tissues were harvested, fixed in formalin, and embedded in paraffin blocks at 14 days after MI and recombinant ANGPTL4 protein injection. Cardiac fibrosis was measured by Masson's trichrome staining. For immunohistochemical analysis, slides were treated with 3% hydrogen peroxide in PBS for 10 minutes at room temperature to block endogenous peroxidase activity. After blocking nonspecific binding with 5% normal goat serum (Sigma-Aldrich, NS02L), the slides were incubated with primary antibody for 18 hours at 4°C. Sections were washed with PBS three times, and then incubated for 1 hour with Alexa-Fluor 488 or 594 secondary antibodies. The images were detected by using a Carl Zeiss confocal microscope, and the images were obtained using Zeiss LSM version 3.2 SP2 software (Carl Zeiss).

*Flow cytometric analysis.* Single cells were isolated from the heart tissues according to a previously described method with minor modifications (6). Harvested hearts were minced and digested in an enzyme mixture solution containing 675 U/mL collagenase I (Sigma-Aldrich, C0130), 187.5 U/mL collagenase XI (Sigma-Aldrich, C7657), 90U DNase I (Sigma-Aldrich, DN25), and 90 U/mL hyaluronidase (Worthington Laboratories, 2592) in PBS with  $\text{Ca}^{2+}$  / $\text{Mg}^{+2}$  for 60 minutes at 37°C with gentle shaking. After incubation, the digestion mixture was homogenized through a 70- $\mu\text{m}$  nylon mesh. The digestion mixture was centrifuged at 2000 rpm for 15 minutes at 4°C and the pellet was suspended in 40% Percoll (GE-Healthcare, 17-0891-02) solution and then carefully flushed with 80% Percoll solution under 40% Percoll solution using a pasture pipette. The tubes were centrifuged at 2200 rpm for 25 minutes at room temperature. After Percoll gradient centrifugation, cardiac leukocytes were collected from the layer between the Percoll solutions. Cells were stained with antibodies at 4°C for 15 minutes simultaneously and were washed, resuspended in staining buffer, and analyzed. The antibodies are listed in Supplemental Table 3. Cell fluorescence was measured with a BD FACSCANTO II (BD Biosciences) and data analysis was performed using FlowJo (Tree Star).

*Statistical Analysis.* All data are expressed as mean  $\pm$  SEM from at least three independent experiments. Differences between experimental and control groups were analyzed by Student's *t* test or 1-way



ANOVA with Bonferroni's multiple comparisons test using SPSS (SPSS Inc). A P value less than 0.05 was considered significant.

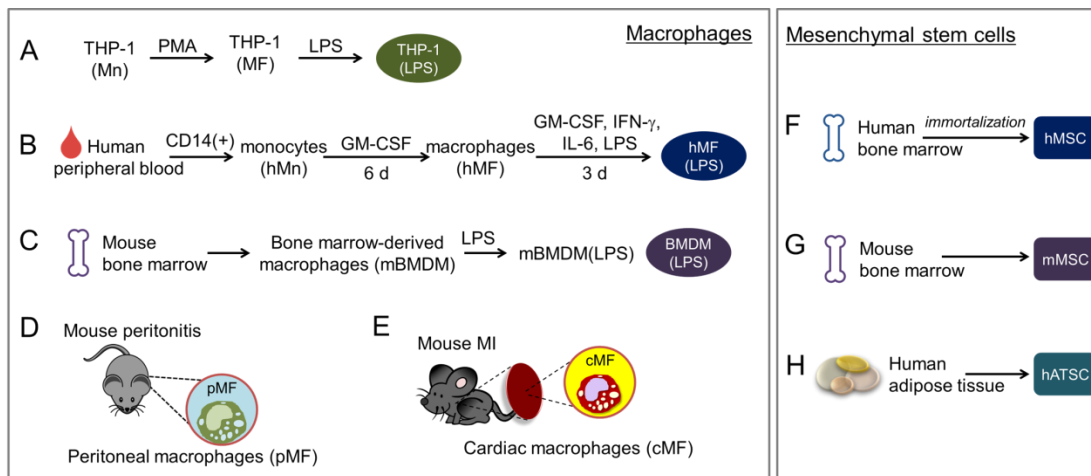

**Figure S1. Schematic of macrophages and mesenchymal stem cell types used in this study.** (A) Human monocytic THP-1 cells were differentiated to THP-1 macrophages by treatment with PMA for 3 days and then stimulated with LPS. (B) Human CD14<sup>+</sup> monocytes were isolated from peripheral blood, then differentiated to macrophages by treatment with GM-CSF, and then stimulated with GM-CSF, IFN- $\gamma$ , IL-6 and LPS. (C) Mononuclear cells were collected from mouse bone marrow and differentiated to macrophages (BMDM). (D) Peritoneal macrophages (pMF) were isolated from mice with peritonitis. (E) Cardiac macrophages (cMF) were isolated from infarcted mouse heart tissue. (F) Immortalized human bone marrow-derived mesenchymal stem cells (hMSCs) were provided as described in Materials and Methods. (G) Mouse MSCs (mMSCs) were isolated from bone marrow. (H) Human adipose tissue-derived MSCs (ATSCs) were isolated from liposuction aspirate fluid.

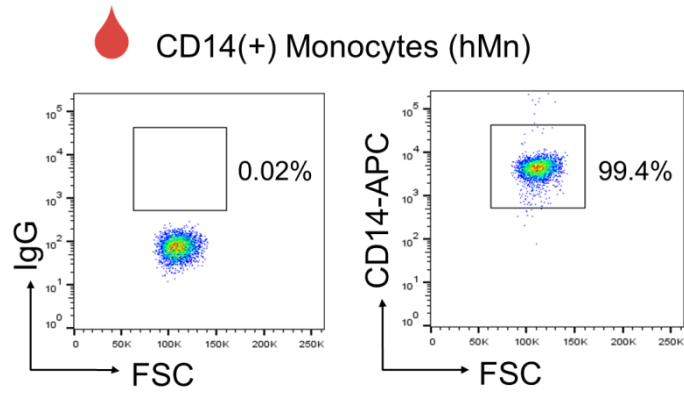

**Figure S2. Human macrophages were differentiated from circulating monocytes.** Flow cytometry gating strategy for isolating human monocytes. CD14<sup>+</sup> monocytes were selected for analysis.

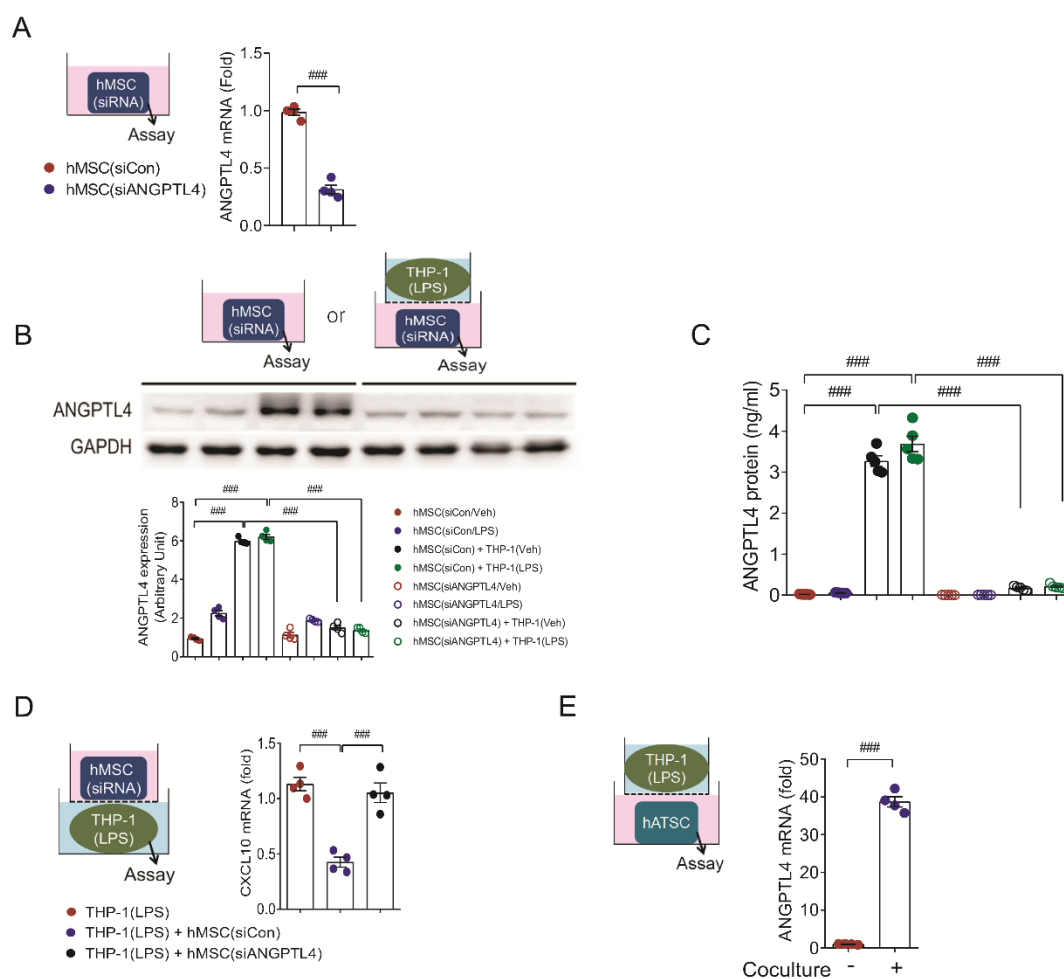

**Figure S3. ANGPTL4 knockdown by siRNA in hMSCs did not inhibit CXCL10 induction in macrophages. (E)** Human adipose tissue-derived MSCs (ATSCs) showed significant upregulation of ANGPTL4 mRNA by coculture with LPS-stimulated macrophages. ATSCs isolated from human adipose tissue were cocultured with LPS-stimulated THP-1 macrophages for 24 hours, and mRNA of ANGPTL4 was measured by real-time PCR.  $n = 4$ . **(A)** ANGPTL4 mRNA was substantially reduced in hMSCs by knockdown with siRNA.  $n = 4$ . In hMSCs **(B)** and cultured medium **(C)**, ANGPTL4 protein was upregulated by coculture with either unstimulated THP-1 macrophages or LPS-stimulated THP-1 macrophages. ANGPTL4 knockdown did not result in ANGPTL4 induction even with coculture with THP-1 macrophages. LPS-treated hMSCs did not induce ANGPTL4.  $n = 5$ . **(A)** The inhibitory effect of hMSCs on pro-inflammatory CXCL10 in THP-1 macrophages was abolished by coculture with hMSCs with ANGPTL4 knockdown.  $n = 4$ . # $P < 0.05$ , ## $P < 0.01$ , ### $P < 0.001$ , ns, not significant (by Student's t test or 1-way ANOVA with Bonferroni's multiple comparisons test).

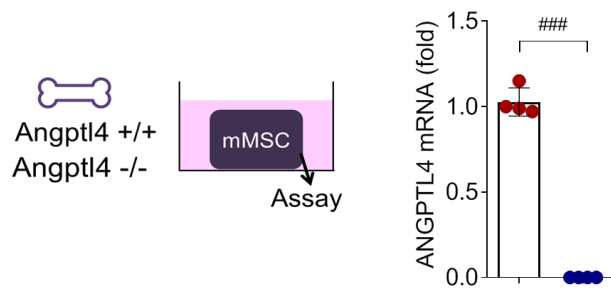

**Figure S4. Mesenchymal stem cells were isolated from ANGPTL4 mouse bone marrow.**

Mouse bone marrow-derived mesenchymal stem cells (mMSCs) were isolated from ANGPTL4 knockout mouse and confirmed by real-time PCR. ###P < 0.001 (by Student's t test).

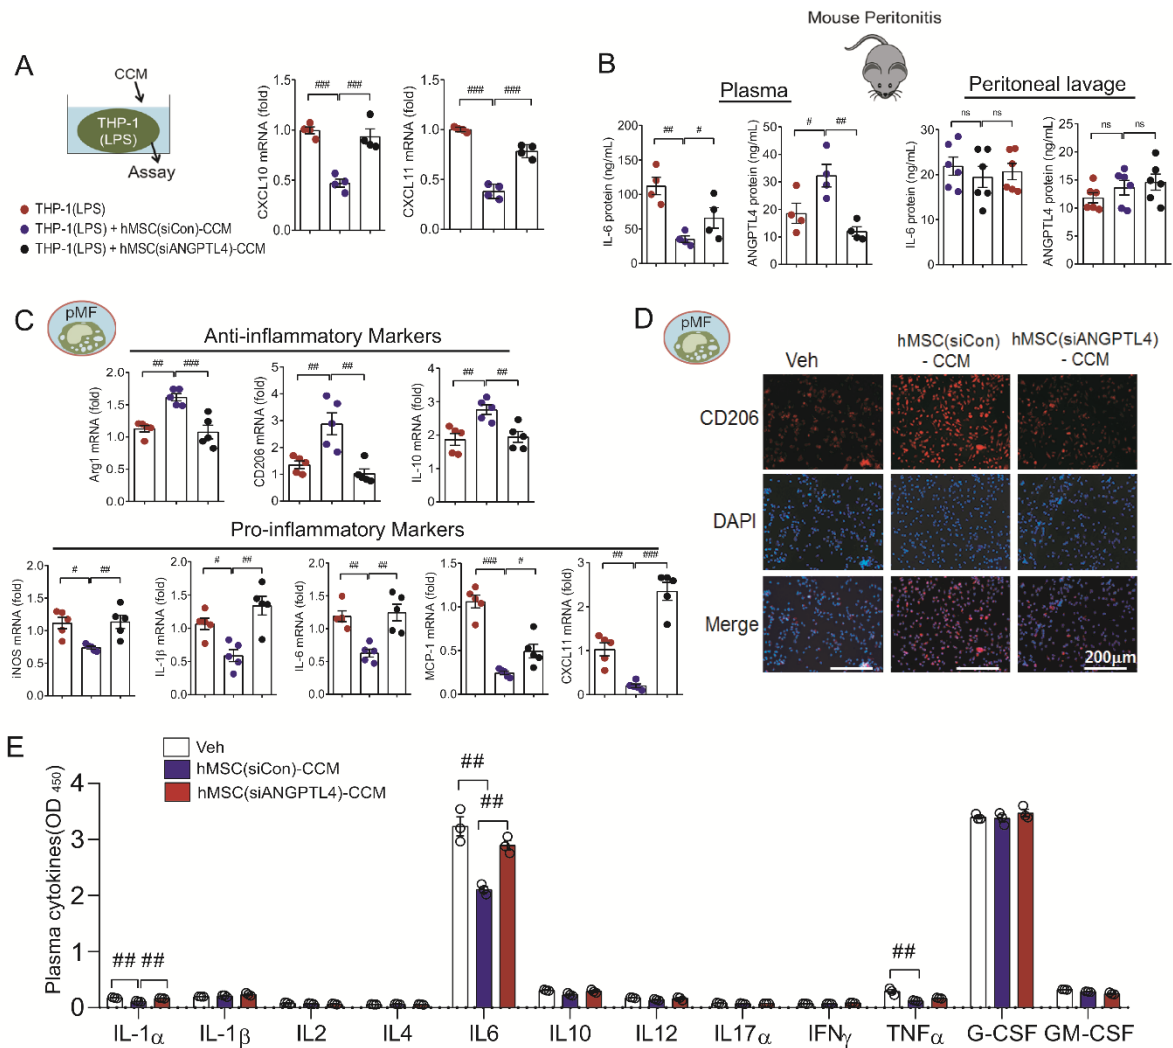

**Figure S5. Coculture medium of MSCs and macrophages suppresses peritoneal macrophage activation dependently on ANGPTL4.** (A) Coculture medium (CCM) was collected from hMSCs cocultured with THP-1 macrophages. Before coculture, hMSCs were transfected with siRNA to knockdown ANGPTL4. In LPS-stimulated THP-1 macrophages, pro-inflammatory genes CXCL10 and CXCL11 were not reduced by treatment with CCM from hMSCs with ANGPTL4 knockdown.  $n = 4$ . (B) Peritonitis was induced by thioglycollate injection for 3 days. CCM from MSCs transfected with control siRNA or ANGPTL4 siRNA was injected into the peritoneum followed by LPS stimulation. ANGPTL4 and IL6 levels of mice with peritonitis were measured by ELISA in blood ( $n = 4$ ) and peritoneal lavage ( $n = 6$ ). (C) Pro-inflammatory and anti-inflammatory genes of peritoneal macrophages were assessed.  $n = 5$ . (D) CD206, an anti-inflammatory marker, was visualized by immunofluorescence staining in peritoneal

macrophages. (E) Inflammatory mediators in the plasma were analyzed by multiplex ELISA. n = 3. #P < 0.05, ##P < 0.01, ###P < 0.001, ns, not significant (by Student's t test or 1-way ANOVA with Bonferroni's multiple comparisons test).

Abbreviation: Veh, vehicle; Arg1, Arginase 1.

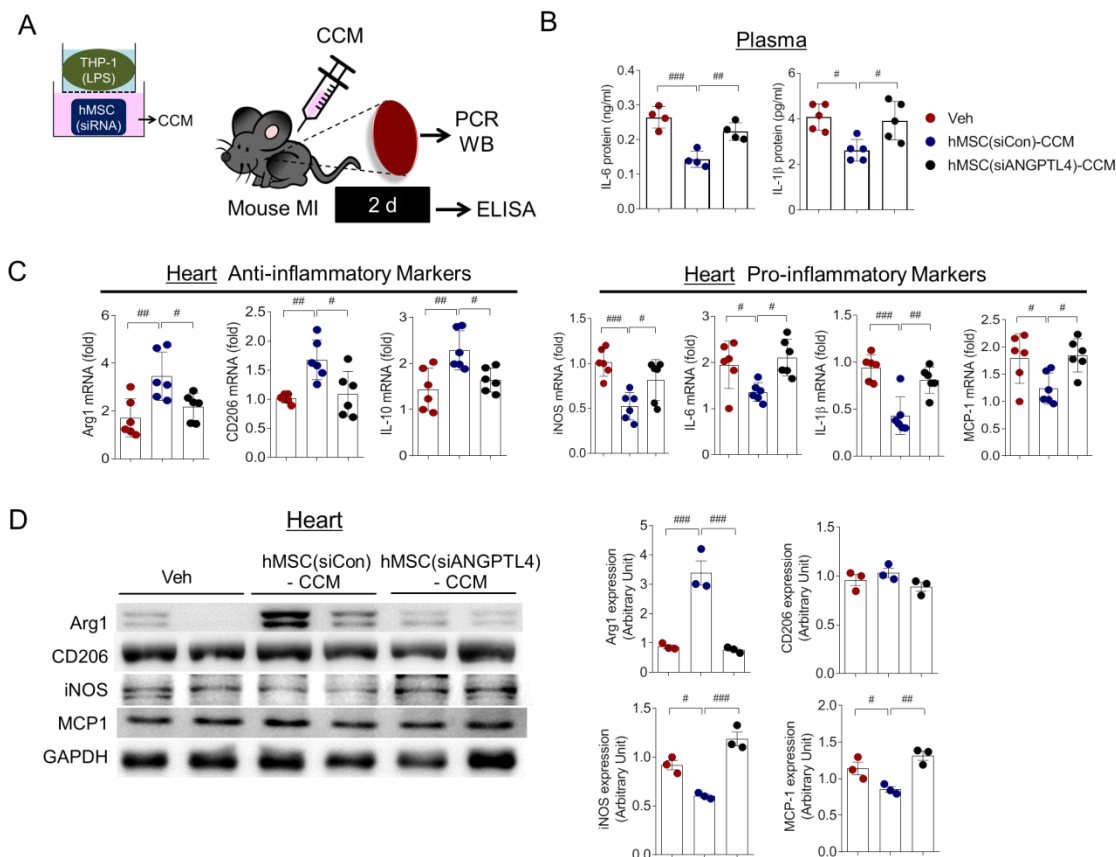

**Figure S6. Cardiac inflammation was not attenuated by coculture medium collected from MSCs with ANGPTL4 knockdown.** (A) MI was induced by coronary artery ligation, and then coculture medium (CCM) from hMSCs transfected with either siRNA control or siANGPTL4 was injected peritoneally. Heart tissues and blood were collected after 2 days for further studies. (B) Circulating IL-6 (n = 4) and IL-1 $\beta$  (n = 5) were not reduced in the ANGPTL4 knockdown hMSC-CCM group. (C) The expression levels of inflammatory markers in the heart tissue were assessed by real-time PCR. n = 6. (D) Anti-inflammatory proteins Arg1 and CD206, and pro-inflammatory iNOS and MCP1 were assessed by Western blot. n = 3. Intensity quantification is representative of mean  $\pm$ SEM. Anti-inflammatory activity was not observed in the ANGPTL4 knockdown hMSC-CCM group. #P < 0.05, ##P < 0.01, ###P < 0.001, ns, not significant (by 1-way ANOVA with Bonferroni's multiple comparisons test).



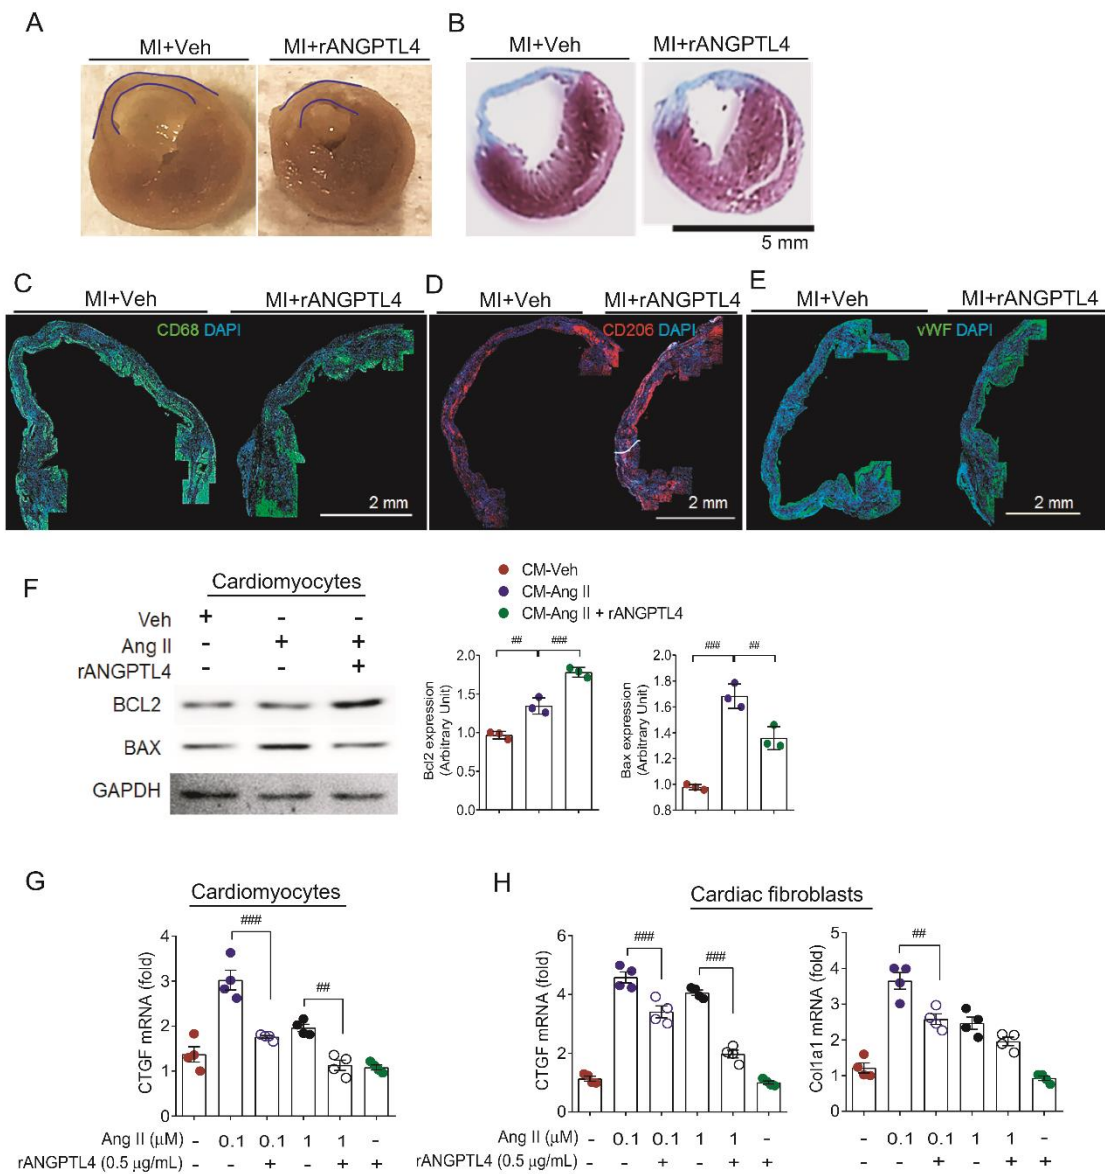

**Figure S7. Cardiac inflammation and function were improved by ANGPTL4 treatment in a mouse myocardial infarction model.** (A) Representative section images of heart tissue after 2 weeks. The blue line indicates the left ventricular wall thickness. (B) Representative images of Masson's trichrome staining-visualized cardiac fibrosis. Scale bar = 5 mm. CD68-positive macrophages (C), anti-inflammatory CD206 (D), and angiogenic vWF (E) were stained in the infarcted myocardium from mice treated with vehicle or 200 ng ANGPTL4. Scale bar = 2 mm. (F) In angiotensin II (AngII)-stimulated neonatal rat cardiomyocytes, the effect of ANGPTL4 (0.5  $\mu$ g/mL) on prosurvival BCL2 and apoptotic BAX was examined by Western blot. Intensity quantification is representative of mean  $\pm$ SEM. (G) CTGF mRNA levels in cardiomyocytes. (H) CTGF and Col1a1 mRNA levels in cardiac fibroblasts.

n = 3. **(G)** In AngII-stimulated neonatal rat cardiomyocytes, the effect of ANGPTL4 on profibrotic connective tissue growth factor (CTGF) was assessed by real-time PCR. n = 4. **(H)** In AngII-stimulated cardiac fibroblasts, the effect of ANGPTL4 on collagen type 1  $\alpha$ 1 chain (Col1a1) and CTGF was assessed by real-time PCR. n = 4. #P < 0.05, ##P < 0.01, ###P < 0.001, ns, not significant (by 1-way ANOVA with Bonferroni's multiple comparisons test).

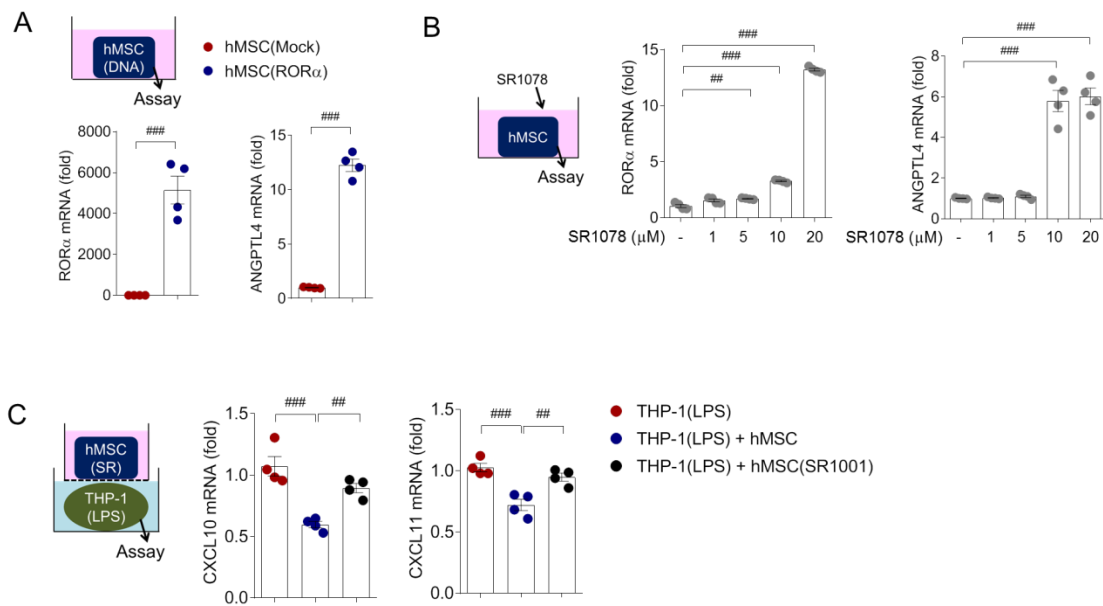

**Figure S8. ROR $\alpha$  contributed to the effect of ANGPTL4 in MSCs.** (A) Overexpression of ROR $\alpha$  induced ANGPTL4 in MSCs. n = 4. (B) ROR $\alpha$  and ANGPTL4 were induced by treatment with ROR $\alpha$  agonist SR1078 in a dose-dependent manner in MSCs. n = 4. (C) MSCs were pretreated with SR1001, an inverse agonist of ROR $\alpha$ , before coculture with macrophages. After 24 hours, expression of CXCL10 and CXCL11 mRNA in macrophages was assayed. n = 4. #P < 0.05, ##P < 0.01, ###P < 0.001, ns, not significant (by 1-way ANOVA with Bonferroni's multiple comparisons test).

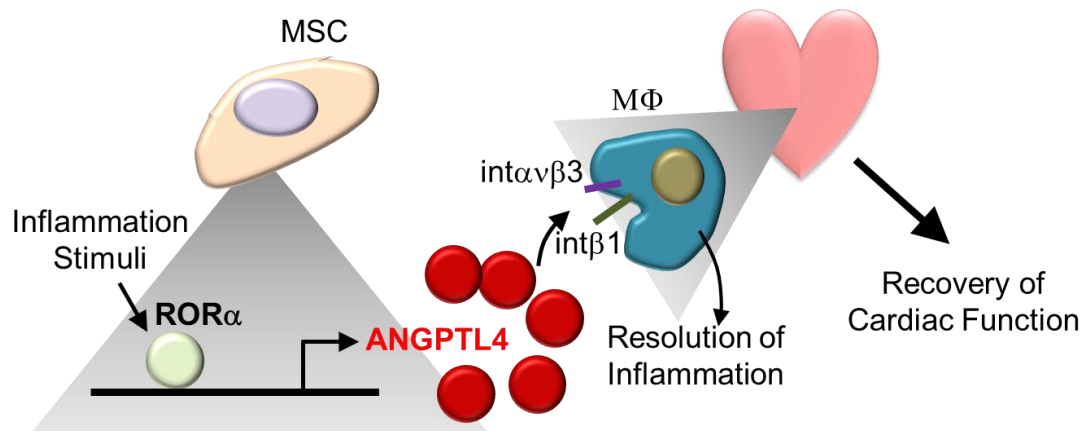

**Figure S9. Schematic representation of the relationship between mesenchymal stem cells and inflammatory macrophages during cardiac injury in mice.**

Supplemental Table 1. List of highly expressed genes (fold increase vs. mesenchymal stem cell alone) in human mesenchymal stem cells cocultured with either THP-1 macrophages or LPS-stimulated THP-1 macrophages for 24 hours.

| Gene symbol  | hMSC+THP  | hMSC+THP(LPS) | Accession    |
|--------------|-----------|---------------|--------------|
| FRG2B        | 20.013742 | 117.79628     | NM_001080998 |
| MTSS1        | 78.99905  | 115.89478     | NM_014751    |
| MLC1         | 12.910219 | 110.87978     | NM_015166    |
| CSF3         | 26.063862 | 103.80238     | NM_000759    |
| IL1RN        | 39.78224  | 102.29219     | NM_173843    |
| IRG1         | 14.826504 | 95.768974     | XM_001133269 |
| KPRP         | 8.060947  | 93.36114      | NM_001025231 |
| RSAD2        | 1.7462701 | 92.58964      | NM_080657    |
| CCL8         | 1.2673303 | 92.349686     | NM_005623    |
| IL3RA        | 19.06517  | 90.95484      | NM_002183    |
| CXCL1        | 61.10998  | 90.61722      | NM_001511    |
| RGS16        | 52.338238 | 87.20401      | NM_002928    |
| SYT7         | 56.867867 | 86.482605     | NM_001252065 |
| THBD         | 12.632683 | 83.6733       | NM_000361    |
| BIRC3        | 51.4013   | 79.457306     | NM_001165    |
| LCE3D        | 3.3024528 | 75.75361      | NM_032563    |
| AREG         | 51.77044  | 75.7262       | NM_001657    |
| STC1         | 153.46706 | 75.3867       | NM_003155    |
| SSTR2        | 5.191967  | 73.438736     | NM_001050    |
| PTGS1        | 48.625225 | 71.869934     | NM_000962    |
| MUC20        | 2.929484  | 71.061554     | NM_001098516 |
| GBP5         | 2.5838315 | 69.04816      | NM_052942    |
| ZBP1         | 0.9983463 | 68.7907       | NM_030776    |
| CCL4         | 23.309155 | 65.36921      | NM_002984    |
| RRAD         | 5.3951774 | 63.416737     | NM_004165    |
| AMPD3        | 45.102108 | 61.01916      | NM_001025390 |
| OR5K2        | 1.8623062 | 59.38474      | NM_001004737 |
| IL32         | 13.562407 | 56.298466     | NM_001012633 |
| ISG20        | 1.3107475 | 55.649574     | NM_002201    |
| MTSS1        | 55.000267 | 55.36222      | NM_014751    |
| CTSS         | 11.129068 | 54.720127     | NM_004079    |
| OR10X1       | 1.2673303 | 54.15676      | NM_001004477 |
| TFPI2        | 59.33184  | 48.125156     | NM_006528    |
| ANGPTL4      | 82.74972  | 45.730583     | NM_139314    |
| ESM1         | 24.153831 | 43.54558      | NM_007036    |
| MYZAP        | 1.2673303 | 38.52825      | NM_001018100 |
| SSTR2        | 5.447201  | 37.957775     | NM_001050    |
| MAEL         | 1.2673303 | 37.237827     | NM_032858    |
| TRIB3        | 14.507488 | 37.06422      | NM_021158    |
| SLCO4A1      | 35.19703  | 27.917551     | NM_016354    |
| PRR9         | 1.2673303 | 27.13163      | NM_001195571 |
| IL18BP       | 0.7729766 | 27.042696     | NM_173042    |
| TRIM63       | 20.09952  | 26.838991     | NM_032588    |
| CLCA4        | 1.2673303 | 25.301376     | NM_012128    |
| FAM65C       | 56.665775 | 25.262968     | NM_080829    |
| GBP7         | 1.2673303 | 25.17499      | NM_207398    |
| PTGS1        | 25.383379 | 25.114967     | NM_000962    |
| C4orf7       | 2.253574  | 25.109753     | NM_152997    |
| OR8D4        | 1.2673303 | 25.089544     | NM_001005197 |
| LOC100128977 | 6.6053166 | 24.96567      | NR_024559    |
| RASGEF1A     | 3.1363468 | 24.915886     | NM_145313    |

|           |           |           |              |
|-----------|-----------|-----------|--------------|
| SYCE3     | 1.9504256 | 24.770735 | NM_001123225 |
| HLA-DQA1  | 3.0240445 | 24.638544 | NM_002122    |
| PRAMEF1   | 1.2673303 | 24.566725 | NM_023013    |
| FAM90A7   | 1.7931097 | 24.428045 | NM_001136572 |
| TGM2      | 10.252964 | 24.40785  | NM_004613    |
| GIMAP5    | 1.9266205 | 24.201519 | NM_018384    |
| DUSP6     | 20.926975 | 24.14736  | NM_001946    |
| SLITRK4   | 9.098912  | 23.873922 | NM_173078    |
| IRAK2     | 14.622249 | 23.800875 | NM_001570    |
| ADAMTS4   | 22.140358 | 23.771454 | NM_005099    |
| RASGEF1B  | 1.2673303 | 23.553087 | NM_152545    |
| ZBP1      | 1.2673303 | 23.533936 | NM_001160419 |
| NOS2      | 1.2673303 | 23.419611 | NM_000625    |
| LCP2      | 1.8960947 | 22.827147 | NM_005565    |
| FGF7      | 16.747692 | 19.553776 | NM_002009    |
| INSL4     | 1.2673303 | 19.335701 | NM_002195    |
| LOC339685 | 8.38755   | 19.215652 | NR_038922    |
| DDIT3     | 6.1530395 | 19.147018 | NM_004083    |
| BST2      | 0.9471841 | 18.856667 | AK291099     |
| BST2      | 0.8987768 | 18.818966 | NM_004335    |
| XKRY2     | 1.2673303 | 18.78471  | NM_001002906 |
| LAMC2     | 13.116164 | 18.779324 | NM_018891    |
| ATF3      | 3.8426325 | 18.688995 | NM_001040619 |
| TNFAIP3   | 10.78105  | 13.81545  | NM_006290    |
| FCRLA     | 10.494733 | 13.792599 | NM_032738    |
| MREG      | 10.194867 | 13.729449 | NM_018000    |
| NLRP3     | 16.090061 | 13.694563 | NM_001079821 |
| LOC284379 | 2.2892432 | 12.516126 | NR_002938    |
| NFKBIA    | 7.1327467 | 6.286956  | NM_020529    |
| XIRP2     | 1.2673303 | 6.2843423 | NM_152381    |
| PLIN2     | 5.2909994 | 6.029651  | NM_001122    |
| EGR2      | 2.982881  | 6.028266  | NM_000399    |
| HIVEP2    | 3.4387348 | 5.883344  | NM_006734    |
| TBRG1     | 3.253084  | 5.8817406 | NM_032811    |
| SEMA5B    | 3.2746005 | 5.8704023 | NM_001031702 |
| LIPG      | 3.4304273 | 5.478354  | NM_006033    |
| LMO4      | 4.822775  | 5.477839  | NM_006769    |
| NR4A2     | 4.672957  | 5.0049267 | NM_006186    |
| ZSWIM4    | 3.914665  | 4.9976964 | NM_023072    |
| LAT2      | 3.4901059 | 4.969203  | NM_032464    |
| SGTB      | 2.7406063 | 4.321316  | NM_019072    |
| ABCC9     | 2.0198138 | 4.3148656 | NM_005691    |
| ZXDA      | 1.8099318 | 4.277924  | NM_007156    |
| RUNX1     | 3.19841   | 4.2706695 | NM_001001890 |
| LMLN      | 1.1112436 | 4.264184  | NM_033029    |
| RORA      | 5.0155215 | 3.9810777 | NM_134260    |
| ZFHX2     | 2.9512088 | 3.9726336 | NM_033400    |
| AIFM2     | 3.1364167 | 3.9704077 | NM_032797    |
| GAB4      | 1.2673303 | 3.9665504 | NM_001037814 |

Human bone marrow-derived mesenchymal stem cells (hMSCs) were cocultured with PMA-differentiated THP-1 macrophages. THP-1 macrophages were either unstimulated or LPS-stimulated.

Genes regulated at the mRNA level were examined using an Agilent microarray to compare cDNA expression profiles between hMSCs and macrophage-cocultured hMSCs.

Supplemental Table 2. List of real-time PCR primers for mouse genes

| Gene symbol                  | Sequences                               |
|------------------------------|-----------------------------------------|
| <i>Angptl4</i>               | Forward: 5'-GGACCTTAACTGTGCCAAGA-3'     |
|                              | Reverse: 5'-CGTGGGATAGAGTGGAAGTATTG-3'  |
| <i>Arg 1</i>                 | Forward: 5'-GATTATCGGAGCGCCTTTCT-3'     |
|                              | Reverse: 5'-AAGAATGGAAGAGTCAGTGTGG-3'   |
| <i>Ccl2 (MCP-1)</i>          | Forward: 5'-CTCACCTGCTGCTACTCATT-3'     |
|                              | Reverse: 5'-TTACGGCTCAACTTCACATTCA-3'   |
| <i>CD206 (MRC1)</i>          | Forward: 5'-GGCGAGCATCAAGAGTAAAGA-3'    |
|                              | Reverse: 5'-CATAGGTCAGTCCCAACCAAA-3'    |
| <i>CD163</i>                 | Forward: 5'-TATGATGGGTGTGAACCACG -3'    |
|                              | Reverse: 5'-CAGTGAGCT TCCCGTTCACC-3'    |
| <i>Gapdh</i>                 | Forward: 5'-GGGTGTGAACCACGAGAAATA -3'   |
|                              | Reverse: 5'-GTCATGAGCCCTTCCACAAT-3'     |
| <i>Il10</i>                  | Forward: 5'-ACAGCCGGAAGACAATAAC-3'      |
|                              | Reverse: 5'-CAGCTGGTCCTTTGTTTGAAAG-3'   |
| <i>Il1<math>\beta</math></i> | Forward: 5'-GGTGTGTGACGTTCCCATTA-3'     |
|                              | Reverse: 5'-TCCTGACCACTGTTGTTTCC-3'     |
| <i>Il6</i>                   | Forward: 5'-ATCCAGTTGCCTTCTTGGGACTGA-3' |
|                              | Reverse: 5'-TTGGATGGTCTTGGTCCTTAGCCA-3' |
| <i>Nos2</i>                  | Forward: 5'-TCACCTAGG GCAGCCGA-3'       |
|                              | Reverse: 5'-TCCGRGGCAAAGCGAGCCAG-3'     |



**Supplemental Table 3. Sources of primary antibodies**

| Antibody                      | Supplier                  | Catalogue # | Application       |
|-------------------------------|---------------------------|-------------|-------------------|
| ANGPTL4                       | Sigma-Aldrich             | SAB1407445  | WB 1:1000         |
| ARG 1                         | Cell Signaling Technology | 93668       | WB 1:2000         |
| iNOS                          | Cell Signaling Technology | 2977        | WB 1:2000         |
| GAPDH                         | Santa Cruz Biotech        | sc-32233    | WB 1:2000         |
| I $\kappa$ B $\alpha$         | Cell Signaling Technology | 9242        | WB 1:2000         |
| MCP 1                         | Santa Cruz Biotech        | sc-52701    | IHC 1:200         |
| ROR $\alpha$                  | Abcam                     | ab60134     | ChIP              |
|                               | ThermoFisher scientific   | PA5-23267   | WB 1:1000         |
| Integrin $\beta$ 1            | Abcam                     | ab24693     | Neu 20 $\mu$ g/mL |
| Integrin $\alpha$ v $\beta$ 3 | Millipore                 | MAB1976     | Neu 20 $\mu$ g/mL |
| BAX                           | Santa Cruz Biotech        | sc-526      | WB 1:1000         |
| BCL2                          | Santa Cruz Biotech        | sc-492      | WB 1:1000         |
| CD68                          | Biomedicals               | T3003       | IHC 1:100         |
|                               | Abcam                     | ab955       | IHC 1:100         |
| von Willebrand factor (vWF)   | Sigma-Aldrich             | F3520       | IHC 1:100         |
| CD206                         | Abcam                     | ab64693     | IHC 1:100         |
| CD45(30-F11), Pacific Blue    | eBioscience               | MCD4528     | FC                |
| CD11b(M1/70), PE              | eBioscience               | 12-0112     | FC                |
| F4/80(BM-8), PerCP-Cyanine5.5 | eBioscience               | 45-4801-80  | FC                |
| CD80(B7-1), FITC              | eBioscience               | 11-0801     | FC                |
| Ly6C(HK1.4), FITC             | BioLegend                 | 128005      | FC                |
| CD14(HCD14)-APC               | BioLegend                 | 325608      | FC                |
| Human IgG Fc(HP6017)          | BioLegend                 | 409303      | FC                |

ChIP: Chromatin immunoprecipitation; FC: Flow cytometry; IHC: Immunohistochemistry; Neu: Neutralizing; WB: Western blot

## References

1. Kim HK, Youn BS, Shin MS, Namkoong C, Park KH, Baik JH, et al. Hypothalamic Angptl4/Fiaf is a novel regulator of food intake and body weight. *Diabetes*. 2010;59(11):2772-80.
2. Cho DI, Kim MR, Jeong HY, Jeong HC, Jeong MH, Yoon SH, et al. Mesenchymal stem cells reciprocally regulate the M1/M2 balance in mouse bone marrow-derived macrophages. *Experimental & molecular medicine*. 2014;46:e70.
3. Bhattacharjee J, Das B, Mishra A, Sahay P, and Upadhyay P. Monocytes isolated by positive and negative magnetic sorting techniques show different molecular characteristics and immunophenotypic behaviour. *F1000Research*. 2017;6:2045.
4. Zarif JC, Hernandez JR, Verdone JE, Campbell SP, Drake CG, and Pienta KJ. A phased strategy to differentiate human CD14+monocytes into classically and alternatively activated macrophages and dendritic cells. *BioTechniques*. 2016;61(1):33-41.
5. Kim YS, Jeong HY, Kim AR, Kim WH, Cho H, Um J, et al. Natural product derivative BIO promotes recovery after myocardial infarction via unique modulation of the cardiac microenvironment. *Scientific reports*. 2016;6:30726.
6. Sager HB, Hulsmans M, Lavine KJ, Moreira MB, Heidt T, Courties G, et al. Proliferation and Recruitment Contribute to Myocardial Macrophage Expansion in Chronic Heart Failure. *Circulation research*. 2016;119(7):853-64.
